# Supplementary material
Source: PubMed Central journal article supplement (PMC7641145)

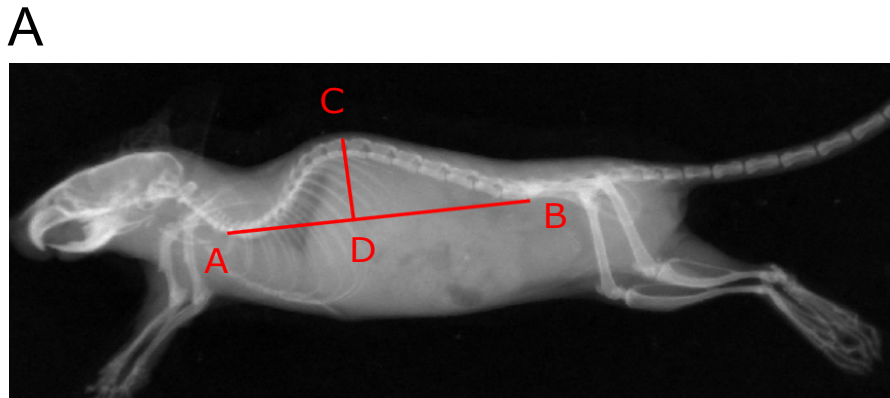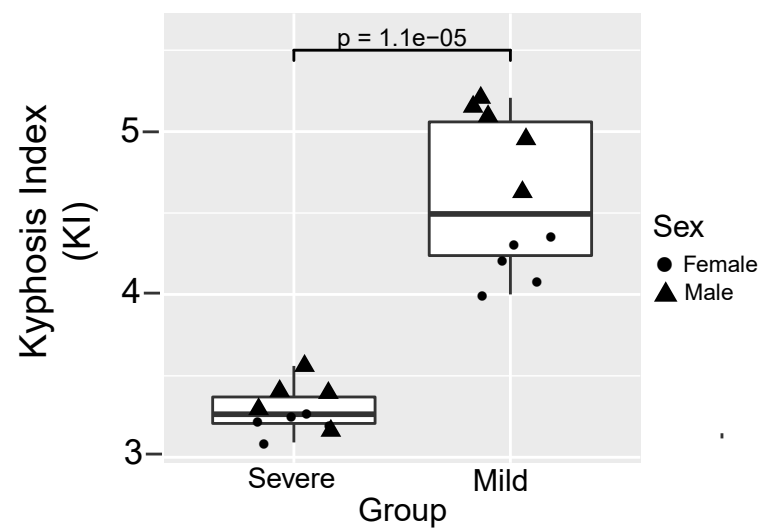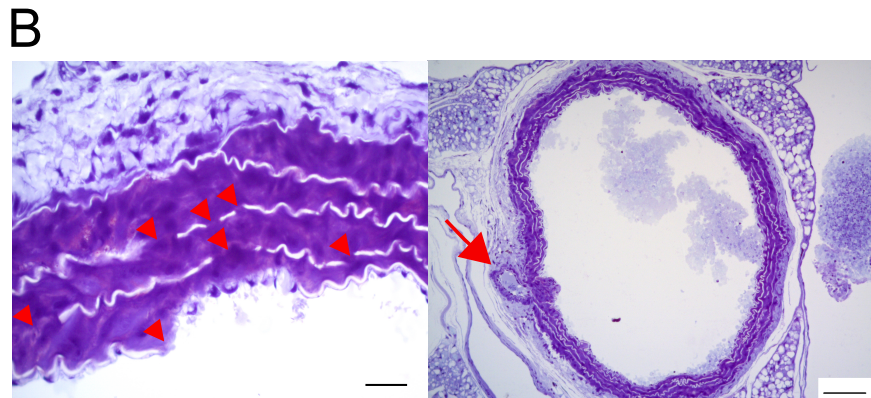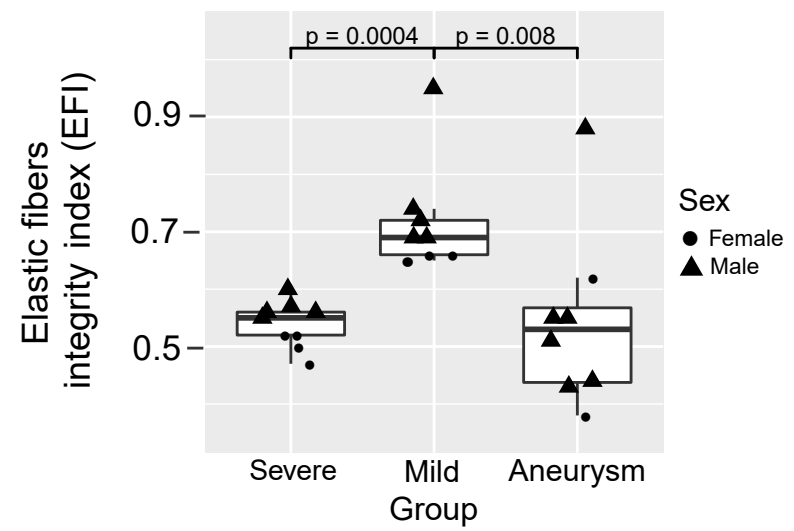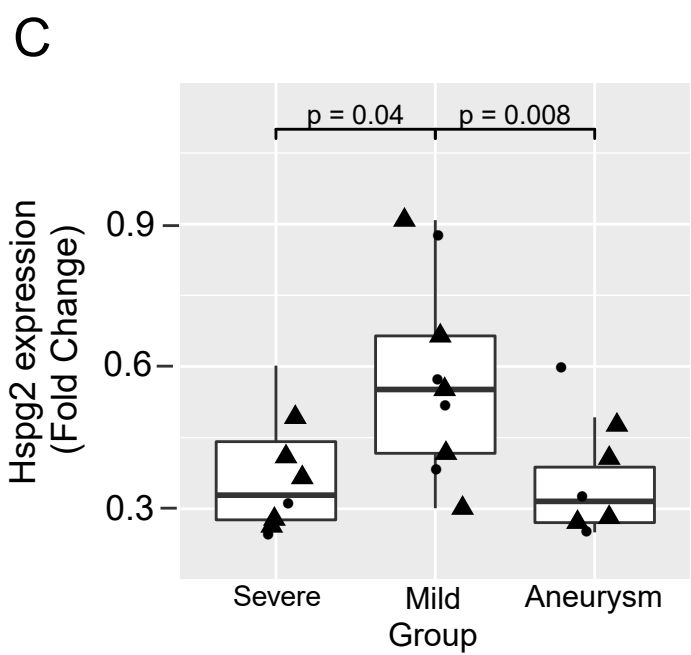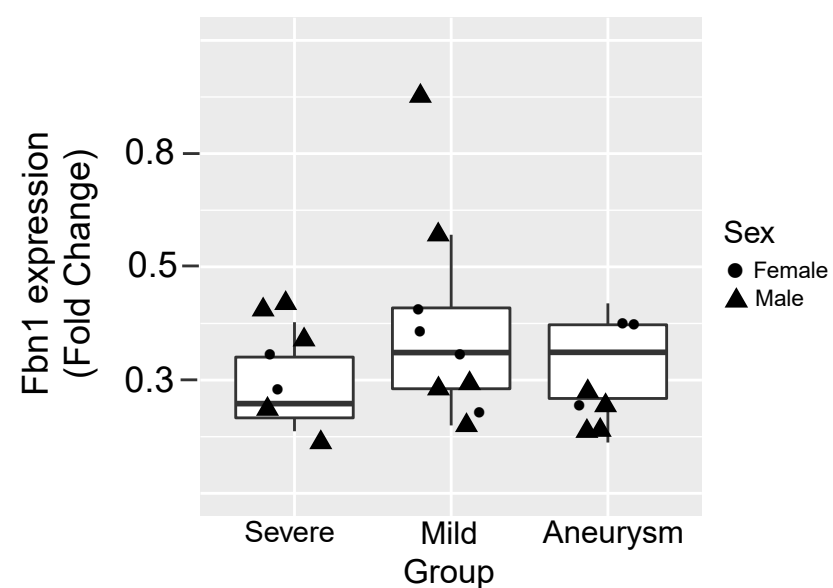

Supplement: 41431_2020_666_MOESM2_ESM.pdf [file 41431_2020_666_MOESM2_ESM.pdf]
